# Supplementary material
Source: publisher figshare collection journal article supplement (https://gsajournals.figshare.com/articles/dataset/_/6007730)
Supplement: Supplementary file 7 [file 2]

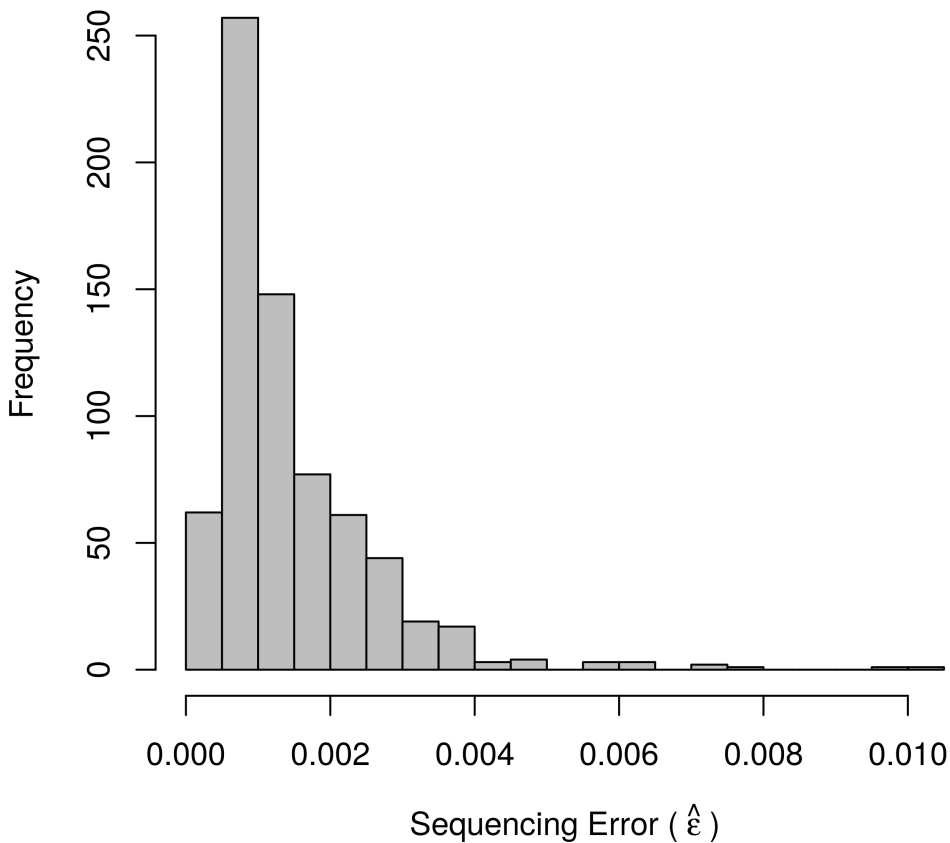

**Figure S7** Distribution of the sequencing error estimates,  $\hat{\epsilon}$ , from GUS-LD for all pairs of SNPs in the deer data set.
