# Supplementary material
Source: publisher figshare collection journal article supplement (https://gsajournals.figshare.com/articles/dataset/_/6007730)

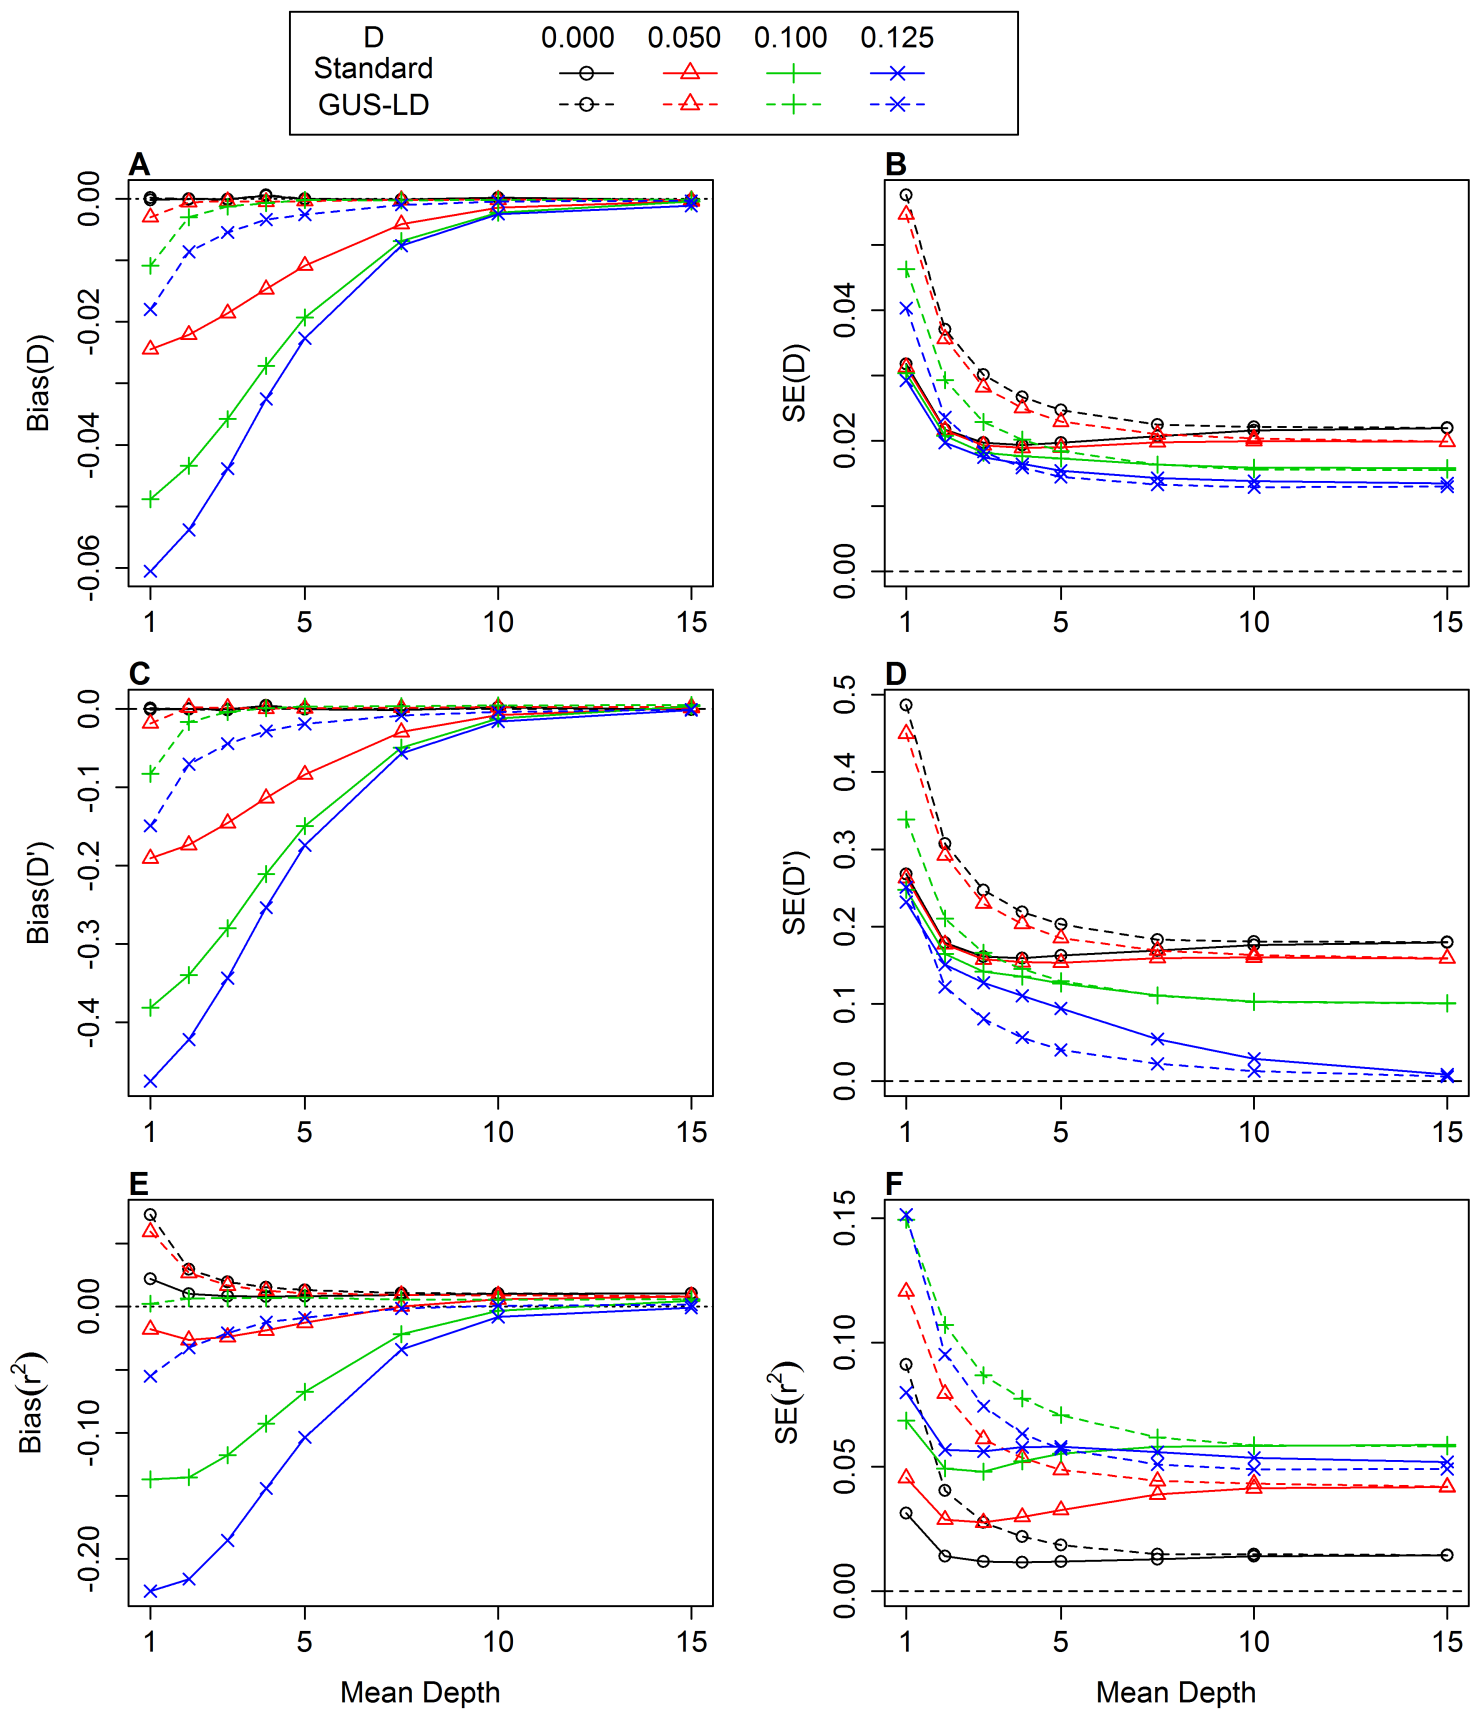

Supplement: Supplementary file 5 [file 2]

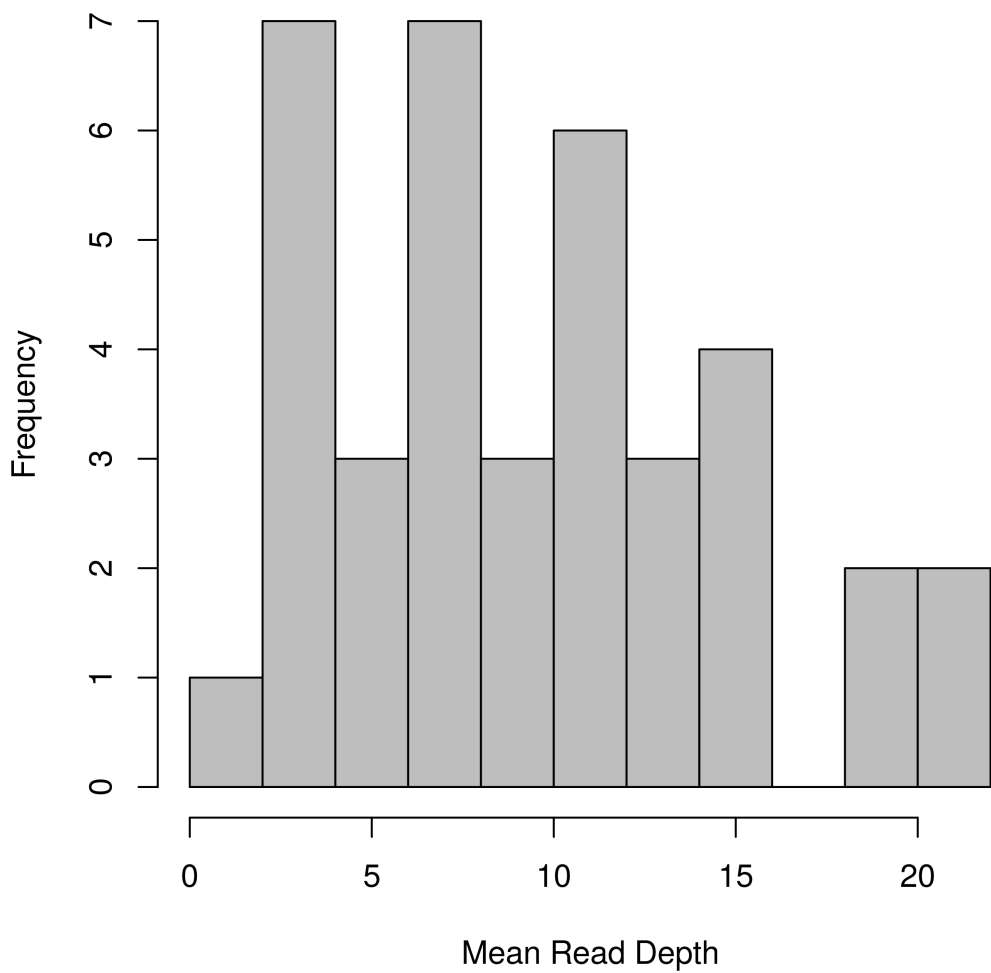

**Figure S6** Distribution of the mean read depths for the SNPs in the deer data set.

Supplement: Supplementary file 6 [file 2]
